1 Copy-out-paste-in transposition of a Tn6283-like integrative element assists interspecies

2 antimicrobial resistance gene transfer from *Vibrio alfacensis*

3

4 Lisa Nonaka,<sup>1,2\*</sup> Michiaki Masuda,<sup>1</sup> Hirokazu Yano<sup>3\*</sup>

5

6 <sup>1</sup>Department of Microbiology, Dokkyo Medical University School of Medicine, Mibu,

7 Tochigi, Japan

8 <sup>2</sup>Faculty of Human Life Sciences, Shokei University, Kumamoto, Japan

9 <sup>3</sup>Graduate School of Life Sciences, Tohoku University, Sendai, Japan

10

11 Short title: Copy-out integrative element carrying a beta-lactamase gene

12

13 \*Corresponding authors

14 Email: nonaka20@shokei-gakuen.ac.jp (LN); yano.hirokazu@ige.tohoku.ac.jp (HY)

15

## 16 **Abstract**

17 The exchange of antimicrobial resistance (AMR) genes between aquaculture and terrestrial  
18 microbial populations has emerged as a serious public health concern. However, the nature  
19 of the mobile genetic elements in marine bacteria is poorly documented. To gain insight into  
20 the genetic mechanisms underlying AMR gene transfer from marine bacteria, we mated a  
21 multi-drug resistant *Vibrio alfacensis* strain with an *Escherichia coli* strain, and then  
22 determined the complete genome sequences of the donor strain and multidrug-resistant  
23 transconjugants. Sequence analysis revealed a conjugative plasmid of the MOB<sub>H</sub> family in  
24 the donor strain, which was integrated into the chromosome of the recipient. The plasmid  
25 backbone in the transconjugant chromosome was flanked by two copies of a 7.1 kb  
26 integrative element, designated Tn6945, harboring a beta-lactamase gene that conferred  
27 ampicillin resistance to the host cell. Use of a *recA* mutant *E. coli* strain as the recipient  
28 yielded a transconjugant showing ampicillin resistance but not multidrug resistance,  
29 suggesting the involvement of homologous recombination in plasmid integration into the  
30 chromosome. Polymerase chain reaction experiments revealed that Tn6945 generates a  
31 circular copy without generating an empty donor site, suggesting that it moves via a copy-  
32 out-paste-in mode, as previously reported for Tn6283. Transposition of the integrative  
33 element into multiple loci in the recipient chromosome increased the resistance level of the  
34 transconjugants. Overall, these results suggest that Tn6283-like copy-out integrative  
35 elements and conjugative plasmids additively spread AMR genes among marine bacteria  
36 and contribute to the emergence of isolates with high-level resistance through amplification  
37 of AMR genes.

## 38 Introduction

39 Antimicrobials have been used globally in aquaculture to control fish diseases. Although this  
40 approach helps to maintain a stable supply of aquacultural products, misuse of  
41 antimicrobials has led to the emergence of antimicrobial-resistant microbes and the  
42 accumulation of resistance genes at aquaculture sites [1, 2]. As the spread of multidrug-  
43 resistant (MDR) bacteria and pan-drug-resistant bacteria is threatening human life [3, 4], it is  
44 important to obtain clues about whether and how aquatic and terrestrial microbial  
45 populations exchange genetic materials.

46 Plasmids [5] and integrative conjugative elements [6] are DNA units that can move from one  
47 cell to another through conjugation machinery, including direct movement between species  
48 [7, 8] and indirectly mobilize genes on specific mobile elements [9–11]. Plasmids can be  
49 classified into families according to replicon type or mobilization machinery type for  
50 epidemiological purpose [12, 13]. Transposons are DNA units that move from one locus to  
51 another in a genome. They can move via cut-and-paste or copy-and-paste mode [14, 15]  
52 from one replicon to another replicon, such as conjugative plasmid co-occurring in the cell.  
53 Genes embedded in these mobile genetic elements are thus readily shared among bacteria  
54 and provide genetic resources for microbial adaptation in changing environments.

55 To increase knowledge of the genetic mechanisms underlying the spread of  
56 antibiotic resistance genes at aquaculture sites, we previously collected resistant bacteria  
57 from sediments at an aquaculture site in Kagawa, Japan [16–18]. We identified a self-  
58 transmissible MDR plasmid of the MOB<sub>H</sub> family, named pAQU1, that can replicate in both  
59 the original host *Photobacterium damsela* subsp. *damsela* and in *Escherichia coli* [17].  
60 Subsequently, another MOB<sub>H</sub>-family MDR plasmid, named pSEA1, was identified in a *Vibrio*

61 *alfacsensis* isolate (previously identified as *V. ponticus*) [19]. The pSEA1 carries a 12 kb  
62 nonconjugative integrative element Tn6283 in addition to antimicrobial resistance (AMR)  
63 genes. Although pSEA1 could not replicate in *E. coli* at 42°C, it could integrate in the *E. coli*  
64 chromosome upon conjugation via homologous recombination between two Tn6283 copies:  
65 one on pSEA1 and another that moved from pSEA1 into the chromosome [19]. Further,  
66 Tn6283 was identified as a new type of transposon moving via a copy-out-paste-in mode  
67 without generating an empty donor site, presumably using tyrosine site-specific  
68 recombinases. However, it is not known whether interspecies gene transfer assisted by  
69 Tn6283-like integrative elements is common in nature.

70 To obtain further insights into the mechanisms behind genetic exchange among  
71 aquaculture-associated bacteria, in this study, we mated another MDR *Vibrio* isolate, *V.*  
72 *alfacsensis* 04Ya249, with *E. coli* strains in the laboratory and then determined the genome  
73 sequences of both the donor and transconjugants. We identified a new Tn6283-like  
74 integrative element and showed that transposition of this element not only assisted the  
75 horizontal transfer of an AMR gene embedded on the plasmid but also affected the  
76 resistance levels of the recipient cell depending on the copy number integrated in the  
77 genome.

## 78 **Results**

### 79 **Identification of a Tn6283-like integrative element carrying a beta-** 80 **lactamase gene**

81 *V. alfacsensis* strain 04Ya249 was previously isolated from sea sediment at an aquaculture  
82 site [16] and shows resistance to erythromycin, tetracycline, and ampicillin [20]. To identify  
83 active mobile elements in this strain that are relevant to its AMR, the strain was mated with

84 macrolide-sensitive *E. coli* JW0452, and the first transconjugant was selected in the  
85 presence of erythromycin at 42°C (Fig 1A) in a non-quantitative manner. One transconjugant  
86 was named strain TJ249. Quantitative mating assays were then performed using a  
87 rifampicin-resistant recipient strain, JW0452rif, under selection with tetracycline, ampicillin,  
88 and rifampicin, but not erythromycin, at 42°C. The transfer frequency of tetracycline  
89 resistance from *V. alfacensis* 04Ya249 to *E. coli* JW0452rif was determined to be  
90 approximately  $10^{-9}$  per donor, indicating a very rare event, generating 0–3 transconjugant  
91 colonies per mating.

92

93 **Fig 1. Identification of the integrative element Tn6945.** (A) Capture of pSEA2 and Tn6945 in  
94 *E. coli* by mating assays. (B)(i) Tn6945 insertion sites in pSEA1 and chromosome 1 of *V.*  
95 *alfacensis* 04Ya249. (ii) Schematic representation of Tn6945 and pSEA2 insertion sites in *E.*  
96 *coli* TJ249. (C) Genetic organization of Tn6283 and Tn6945. The nicking sites used for  
97 circularization were six bases upstream of the 5'-end of motif C and the 3'-end of motif C'  
98 (black arrowheads). No strand exchange was detected on the bottom strand (white  
99 arrowheads). (D) Nucleotide sequences of Tn6945 terminal regions (*attL* and *attR*), target  
100 site (*attB*), and joint region (*attTn*) on the circular form. Sequences shown in orange are  
101 parts of a mobile unit. PCR products of *attTn* from strains 04Ya249 and LN95 were cloned  
102 into T-vector and sequenced. The observed frequency is shown on the right side of each  
103 sequence type.

104

105 The genome sequences of strains 04Ya249 and TJ249 were determined using the  
106 PacBio RS II platform. The genome of strain 04Ya249 consists of four replicons: two  
107 chromosomes, one putative conjugative plasmid pSEA2, and a smaller plasmid pVA249 (Fig

108 1A). Strain 04Ya249 has a very similar genome architecture to the database strain *V.*  
109 *alfacensis* CAIM 1831 based on the average nucleotide identity and gene synteny (S1 Fig).  
110 Seven AMR genes were identified on plasmid pSEA2 (S2 Fig). One beta-lactamase gene  
111 (*CARB-19* allele in the CARD database [21]) was located within the 7.1-kb repeat region  
112 found in both chromosome 1 and plasmid pSEA2 (Fig 1B(i)), which contained four protein-  
113 coding sequences in addition to the beta-lactamase gene (Fig 1C). Each of these four coding  
114 sequences showed homology, albeit with very low gene product identity, to the four coding  
115 sequences clustered at one end of Tn6283 from strain 04Ya108 (Fig 1C). This repeat region  
116 was confirmed to be an active integrative element and was designated Tn6945 in the  
117 transposon registry [22].

118 The chromosome of *E. coli* TJ249 contained two notable insertions (Fig 1B(ii)), a  
119 smaller insertion of Tn6945 alone and a larger insertion containing a complete copy of  
120 pSEA2 and an additional copy of Tn6945 (Fig 1B(ii)). This indicated that Tn6945 has at least  
121 two target sites in the *E. coli* chromosome. Sequence comparison of the Tn6945 insertion  
122 sites in the *E. coli* genome (Fig 1D) indicated that Tn6945 inserts its terminal inverted  
123 repeats, ending with 5'-GTA-3' (termed C and C') along with an additional 6 bp from the  
124 donor molecule into the target site (Fig 1D).

125 As plasmid pSEA2 was very similar to the previously reported plasmid pSEA1  
126 (accession no. LC081338.1) from strain 04Ya108 [19], we also determined the complete  
127 genome of strain 04Ya108 for comparison with that of strain 04Ya249. As predicted from  
128 the Southern hybridization experiment in a previously study, strain 04Ya108 possessed two  
129 copies of Tn6283, one in chromosome 1 and the other in plasmid pSEA1. pSEA1 also carried  
130 the Tn6945 insertion in the same locus as in pSEA2 (S2 Fig). Therefore, pSEA2 may be a  
131 precursor of pSEA1.

132

### 133 **Transposition of Tn6945 and plasmid integration in mating**

134 The direct repeats of Tn6945 in the TJ249 chromosome suggested that the plasmid was  
135 integrated into the recipient chromosome through transposition of Tn6945, with  
136 subsequent integration of pSEA2 into the chromosome facilitated by the homology of the  
137 Tn6945 copy on the chromosome (referred to as a two-step gene transfer mechanism in the  
138 previous study [19]). If this scenario holds, transposition of Tn6945 alone should occur more  
139 frequently than pSEA2 integration upon mating, and pSEA2 integration would be reduced in  
140 frequency or abolished altogether in the chromosome of a *recA*-null mutant recipient. To  
141 test these possibilities, we conducted additional mating assays.

142 Transposition of Tn6945 in the recipient cell upon mating was detected based on the  
143 transfer frequency of ampicillin resistance alone, and plasmid integration was detected by  
144 the transfer of both ampicillin and tetracycline resistance (Fig 1A). Tetracycline-resistant  
145 JW0452rif transconjugants were detected only in 2 out of 4 replicated mating experiments  
146 (Fig 2). Ampicillin-resistant transconjugants were obtained at a 295-fold higher frequency  
147 than tetracycline and ampicillin-resistant transconjugants (Fig 2). Moreover, when *E. coli*  
148 LN52rif (which already carries one copy of Tn6945) was used as the recipient, tetracycline-  
149 resistant transconjugants were obtained at a 160-fold higher frequency than that observed  
150 when using strain JW0452rif as the recipient (Fig 2).

151

152 **Fig 2. Resistance gene transfer from *V. alfacensis*.** Transfer frequency (Y axis) is the  $\log_{10}$ -  
153 transformed value of the transconjugant colony-forming units (CFU) divided by the donor  
154 CFU and recipient CFU. Four replicate mating experiments were performed. No

155 transconjugant was detected in any of the four replicate experiments using JW0452 $\Delta$ recArif  
156 with tetracycline selection, or in the two replicate experiments using JW0452rif with  
157 tetracycline selection. In one experiment on LN52rif, the donor CFU was not evaluated but  
158 the transconjugant CFU was obtained at a comparable frequency to that observed in the  
159 other three replicate experiments. The detection limit was  $10^{-19}$ .

160

161 When the *recA*-null mutant strain JW0452 $\Delta$ recArif was used as the recipient, transfer of  
162 tetracycline resistance was not observed in any experiment, but ampicillin-resistant  
163 transconjugants were obtained (Fig 2). Collectively, these results suggested that pSEA2  
164 integration, but not transposition of Tn6945, depends on the homologous recombination  
165 system in the recipient cell. Therefore, MDR transconjugants likely emerge through two  
166 distinct intracellular processes: transposition and homologous recombination.

167

### 168 **Copy-out of Tn6945**

169 The previous study [19] revealed the following unique features of Tn6283: (i) it does not  
170 generate an unoccupied donor site upon its circularization *in vivo*, and (ii) the circular form  
171 of the integrative element is generated using only one strand as a template, at least in *E. coli*.  
172 Although Tn6283 encodes tyrosine recombinases but not a single transposase with a D-D-E  
173 motif [23], this behavior is analogous to the copy-out-paste-in transposition mechanism of  
174 insertion sequence elements [24]. To test whether Tn6945 also moves through a copy-out-  
175 paste-in mode, we created a pSEA2-free O4Ya249 derivative strain LN95 carrying only a  
176 single copy of Tn6945 in the chromosome and analyzed production of the Tn6945 circular  
177 molecule in this strain.



178 Two pairs of primers were designed such that one primer anneals to the inside of the  
179 integrative element and the other anneals to the outside of the element, amplifying *attL*  
180 (*intA* side, product 1 in Fig 3A) or *attR* (*bla* side, product 2). By changing the combination of  
181 primers, the joint region (*attTn*) in the circular form of the integrative element (product 3 in  
182 Fig 3A), empty donor site (*attB*), or occupied donor site (product 4) could be amplified by  
183 PCR. The circular form of Tn6945 was detected in both 04Ya249 and LN95 (Fig 3B). This  
184 suggested that the chromosomal copy of Tn6945 is functional in *V. alfacensis*. The empty  
185 donor site (*attB*) could not be detected.

186

187 **Fig 3. Detection of a copy-out event of Tn6945.** (A) Replicon organization of strain 04Ya249  
188 and PCR assay design. Thick black lines with numbers indicate the expected PCR products.  
189 The hypothetical site *attB* was not detected by PCR. The primers used are listed in Table 1.  
190 (B) PCR detection of *attL*, *attR*, *attTn*, and *attB*. The PCR cycle was repeated 35 times for all  
191 targets. (C) Quantitation of *attTn* in the pSEA2-free strain LN95 by quantitative PCR.

192

193 We next cloned the PCR products of *attTn*, and then sequenced 10 cloned molecules  
194 to investigate the sequence variation in the spacer region between the inverted repeat  
195 motifs C and C'. Only one sequence type (5'-TTTTTT-3') was detected in the pSEA2-free  
196 strain LN95 (Fig 1D). Thus, the majority of the circular form is a copy of the ligated product  
197 between the 5'-end of the 6 bp upstream of the motif C terminus and the 3'-end of the  
198 motif C' terminus (the top strand in the gene map of Fig 1C). Two sequence types, 5'-  
199 TTTTTT-3' and 5'-TTTTCT-3', were detected in strain 04Ya249 at a 1:9 ratio (examples of the  
200 Sanger sequencing trace files have been posted in figshare [25]). These findings agree with  
201 the top strand exchange product of chromosome 1 and pSEA2, respectively (Fig 1D).

202 Collectively, these observations suggest that Tn6945 moves via copy-out-paste-in  
203 transposition without undergoing strand exchange of the bottom strand in *V. alfacensis*.

204 To estimate the copy number of the circular form of Tn6945 in the cell population,  
205 we first searched for Illumina reads of strain LN95 that spanned *attTn* or the “hypothetical”  
206 *attB*. Although next-generation sequencing reads were obtained at 229× chromosome  
207 coverage, no reads spanning *attTn* or *attB* were detected [25]. Quantitative PCR further  
208 revealed that the mean *attTn* to *gyrB* ratio was 0.0012 (Fig 3C). This relative copy number  
209 was consistent with the result from a previous study detecting the circular form of Tn6283  
210 in *E. coli*, which showed an *attTn* to chromosome ratio of 0.001 [19].

211

## 212 **The insertion copy number of Tn6945 affects beta-lactam**

### 213 **resistance**

214 The naturally occurring strains 04Ya249 and 04Ya108 carry two copies of Tn6945 and  
215 Tn6283 in their respective genomes. However, it remains unclear whether multiple copies  
216 of integrative elements confer an advantage to the host cell. Three copies of Tn6945 in the  
217 transconjugant TJ249 were initially detected by genome sequencing. Southern hybridization  
218 analysis of other JW0452 transconjugants, which were maintained in the lab without  
219 tetracycline selection, revealed one to two copies of Tn6945 in their respective genomes (S3  
220 Fig). Therefore, we used these transconjugant strains to test whether multiple insertions of  
221 Tn6945 can increase the resistance levels of the transconjugants.

222 Sixteen *E. coli* strains with or without Tn6945 insertion were grown in Luria-Bertani  
223 broth with ampicillin, and then the minimum inhibitory concentrations (MICs) of ampicillin  
224 were determined using the broth dilution method following the Clinical Laboratory

225 Standards Institute (CLSI) guidelines. The MIC was the highest in the clone carrying three  
226 copies of Tn6945, followed by the group of transconjugants carrying two copies and the  
227 group carrying one copy, and the MIC was the lowest in JW0452 (Fig 4). Although within-  
228 group variation was also observed, these results clearly showed that the copy number of  
229 Tn6945 in the genome positively affects the level of beta-lactam resistance of the host cell.

230

231 **Fig 4. The copy number of Tn6945 affects the resistance level.** Sixteen transconjugants and  
232 a control strain (JW0452) were divided into four groups based on the Tn6945 copy number  
233 in the genome. MIC of ampicillin is shown according to copy number.

234

## 235 Discussion

236 *Vibrio* is one of the major bacterial genera found in marine sediments [26], and is among the  
237 most common microbiota of wild and farmed shrimp [27] and fish [28, 29]. Several of the  
238 genus *Vibrio* are pathogens of fishes reared in aquaculture [30], while other subsets of  
239 *Vibrio* species, including *V. cholerae*, *V. parahaemolyticus*, and *V. vulnificus*, which are  
240 ubiquitous in relatively low-salinity sea water, are seafood-borne human pathogens [30, 31].  
241 Thus, *Vibrio* can be considered as a key genus linking AMR genes between aquatic  
242 environments and human-associated environments. Indeed, the accumulation of AMR  
243 genes in this genus has attracted increased research attention, particularly in *V. cholerae* [32,  
244 33]. However, direct experimental evidence for AMR gene transfer from *Vibrio* species to  
245 other human-relevant bacteria is limited.

246 Known genetic mechanisms of AMR gene transfer from *Vibrio* include integrative  
247 conjugative elements [34], A/C plasmids [35, 36], unclassified conjugative plasmids [37],

248 mobilizable genomic islands [38], pAQU1-type MOB<sub>H</sub> family conjugative plasmids [39],  
249 pSEA1-type MOB<sub>H</sub> family conjugative plasmids [19], and a combination of a chromosomal  
250 super-integron and a conjugative plasmid carrying an integron [40]. The host range of  
251 pSEA1-type MOB<sub>H</sub> plasmids, discovered in *V. alfacensis* (for which only one complete  
252 genome was available until the present study), is unknown. In this study, we investigated  
253 how a pSEA1-like plasmid can contribute to AMR gene transfer in a laboratory setting.

254 In contrast to A/C plasmids, autonomous replication of pSEA2 and pSEA1 was  
255 difficult to achieve in *E. coli*, since transconjugant selection yielded *E. coli* clones carrying  
256 plasmid DNA integrated into the chromosome. We consistently observed a two-step gene  
257 transfer mechanism that involves the transposition of a Tn6283-like integrative element and  
258 homologous recombination, which enabled AMR gene transfer beyond the plasmid's  
259 replication host range. This mode of horizontal gene transfer may be important among  
260 marine bacteria, since the plasmid conjugation host range is expected to be wider than the  
261 replication host range [41, 42].

262 Plasmid pSEA1 was found to carry both Tn6283 and Tn6945. However, in the  
263 previous study, only transposition of Tn6283 was observed, likely because we did not  
264 recognize Tn6945 on pSEA1 and did not intend to detect its transposition [19]. The newly  
265 identified Tn6945 is the smallest Tn6283-like “active” integrative element, and it is the only  
266 known element harboring an AMR gene. The beta-lactamase gene identified in this study  
267 was embedded within the mobile DNA unit without an accompanying insertion sequence  
268 element, like the case for Tn3 [43]. This pattern is atypical for recent widespread AMR genes  
269 [44, 45], suggesting an ancient origin for the Tn6283-like element with the beta-lactamase  
270 gene. As Tn6945 can have multiple target sites in a single genome, a Tn6283-like element  
271 may contribute to microbial adaptation to the antimicrobials used at aquaculture sites, with

272 diverse mechanisms beyond mediating the horizontal transmission of AMR genes, such as  
273 increasing the resistance level or gene redundancy preceding evolutionary innovation of an  
274 AMR gene [46].

275         The discovery of Tn6945 highlights four potential core genes (*intA*, *CDS2*, *intB*, and  
276 *CDS4*) of unknown function present in Tn6283-like integrative elements. However, the  
277 specific roles of these gene products in copy-out-paste-in transposition remain to be  
278 determined. A notable difference between an insertion sequence and the Tn6283-like  
279 element is the strong strand bias unique to the latter upon strand exchange, which  
280 generates a figure-eight structure that serves as a template for the circular form [23, 24].  
281 Unlike transposase, tyrosine recombinases usually do not generate a free 3' OH end [47].  
282 Host factor-mediated replication on the top strand exchange product should therefore be a  
283 complex process. We propose that Tn6283-like elements contribute to AMR gene  
284 transmission in marine bacteria. However, we also speculate that the host range of Tn6283  
285 may be limited due to this unusual transpositional process. Further biochemical and  
286 bioinformatic studies on Tn6283-like integrative elements is needed to reveal the  
287 mechanisms of gene transfer among the genus *Vibrio* and other aquaculture-associated  
288 bacteria.

289

## 290 **Materials and methods**

### 291 **Strains and culture media**

292 We used the *Vibrio* strains 04Ya249 [18], LN95, and 04Ya108 [19] in this study. Strain  
293 04Ya108 was previously identified as *Vibrio ponticus* based on 16S rRNA gene sequence  
294 similarity. However, determination of the complete sequence in this study revealed that

295 strain 04Ya108 shows >96% average nucleotide identity to *V. alfacensis* strain CAIM 1831  
296 (DSM 24595) (S1 Fig) [48]. Therefore, strain 04Ya108 was newly classified as *V. alfacensis*.  
297 Strain LN95 is a pSEA2-free tetracycline-susceptible derivative of strain 04Ya249. This strain  
298 was generated through repeated batch culture of 04Ya249, and subsequent single-colony  
299 isolation. The absence of pSEA2 in LN95 was confirmed by next-generation sequencing.

300 We used the *E. coli* strains DH5 $\alpha$  [F<sup>-</sup>,  $\Phi$ 80*lacZ* $\Delta$ M15,  $\Delta$ (*lacZYA-argF*)U169, *deoR*,  
301 *recA1*, *endA1*, *hsdR17*(r $\kappa$ <sup>-</sup>, m $\kappa$ <sup>+</sup>), *phoA*, *supE44*,  $\lambda$ <sup>-</sup>, *thi-1*, *gyrA96*, *relA1*], BW25113 [F<sup>-</sup>,  $\Delta$ (*araD-*  
302 *araB*)567,  $\Delta$ *lacZ4787*(::rrnB-3),  $\lambda$ <sup>-</sup>, *rph-1*,  $\Delta$ (*rhaD-rhaB*)568, *hsdR514*], JW2669 [BW25113  
303  $\Delta$ *recA774::kan*], JW0452 [BW25113  $\Delta$ *acrA748::kan*] [49] and its rifampicin-resistant variant  
304 JW0452rif, LN52, TJ249, and JW0452 $\Delta$ *recA* and its rifampicin-resistant variant  
305 JW0452 $\Delta$ *recA*rif. Strain LN52, which carries a single copy of Tn6945, is a JW0452  
306 transconjugant obtained by ampicillin selection at 42°C. TJ249 is also a JW0452  
307 transconjugant obtained by erythromycin selection at 42°C. The presence of a single Tn6945  
308 copy in the LN52 genome was confirmed by Southern hybridization (S3 Fig).

309 The *recA*-null mutant of JW0452, JW0452 $\Delta$ *recA*, was constructed using the lambda-  
310 Red method [50]. A DNA fragment containing the 5' and 3' sequences of the *recA* gene and  
311 a chloramphenicol resistance gene was amplified by PCR using primers YO-175 and  
312 RecA\_stop\_primingsite\_2 and plasmid pKD3 [50] as a template (Table 1). The PCR products  
313 (700 ng) were introduced into electrocompetent cells of JW0452 carrying pKD46 by  
314 electroporation using a Gene Pulser Xcell<sup>TM</sup> (BioRad, Hercules, CA, USA). The occurrence of  
315 recombination at the expected site was confirmed by PCR using primers CAT-584 and  
316 BW25113\_2815723f (Table 1). The absence of the *recA* gene was also confirmed by PCR  
317 using primers LN192\_RecA1 and LN193\_RecA2.

318 *Vibrio alfacensis* strains were cultured in BD Bacto™ brain heart infusion medium  
319 (BD237500; Becton, Dickinson, and Company, Franklin Lakes, NJ, USA) supplemented with  
320 up to 2% NaCl. *E. coli* strains were cultured in BD Difco™ LB Broth, Miller (BD244520; Becton,  
321 Dickinson, and Company). BD Difco™ Mueller Hinton Broth (BD 275730; Becton, Dickinson,  
322 and Company) was used for antibiotic susceptibility testing of *E. coli*. BD Difco™ Marine  
323 Broth 2216 (BD279110; Becton, Dickinson, and Company) was used for filter mating. Solid  
324 media were prepared by adding 1.5% agar to the broth. Antibiotics were added to the  
325 medium at the following concentrations when required: erythromycin (Nacalai Tesque,  
326 Kyoto, Japan), 100 µg/ml; tetracycline (Nacalai Tesque), 10 µg/ml; rifampicin (Sigma-Aldrich,  
327 St. Louis, MO, USA), 50 µg/ml; ampicillin (Nacalai Tesque), 100 µg/ml.  
328

329 **Table 1. Oligonucleotides used.**

| Name                    | Sequence (5' to 3')  | Purpose                                                              |
|-------------------------|----------------------|----------------------------------------------------------------------|
| LN112                   | GGGTTACCTTCCCAATGCGT | Southern hybridization probe for Tn6945 <i>intA</i>                  |
| LN113                   | CGACTGTTGGTAGCGACTGT | Southern hybridization probe for Tn6945 <i>intA</i>                  |
| LN_142_junction2        | AAGATGGTAAAAGTGTCCA  | Detection of <i>attTn</i> by qPCR                                    |
| LN_143_junction2        | TTTGTGTGTAGCCCTTGTG  | Detection of <i>attTn</i> by qPCR                                    |
| LN_150_intA2            | GGTTATGTGGAGAAGTTGCC | Detection of <i>intA</i> by qPCR                                     |
| LN_151_intA2            | TGAGTTCGGTTTCTTGCTTC | Detection of <i>intA</i> by qPCR                                     |
| LN_181_Valc_chr1_attB_L | CGAGGGTAAAGTGCCAACAT | Detection of chromosomal <i>attB</i> and <i>attL</i> by standard PCR |
| LN183_Valc_chr1_attB_R2 | ACATCAGCAGGAGTTAGTTG | Detection of chromosomal                                             |

|                         |                                                                                |                                                                          |
|-------------------------|--------------------------------------------------------------------------------|--------------------------------------------------------------------------|
|                         |                                                                                | <i>attB</i> and <i>attL</i> by standard PCR                              |
| LN184_04Ya249_gyrBf1    | AACAGAATTGCACCCAGAAG                                                           | Detection of <i>gyrB</i> by qPCR                                         |
| LN185_04Ya249_gyrBr1    | GAAGACCGCCTGATACTTTG                                                           | Detection of <i>gyrB</i> by qPCR                                         |
| LN127_cds303_r137-156   | CTCTGGCTCACCGTTAGAGG                                                           | Detection of 1 kb <i>attTn</i> and <i>attL</i> detection by standard PCR |
| LN128_bla_r16-36        | GCATTTTTGCACATGCTAATG                                                          | Detection of 1 kb <i>attTn</i> and <i>attR</i> by standard PCR           |
| YO-175                  | CAGAACATATTGACTATCCGGTATT<br>ACCCGGCATGACAGGAGTAAAAAT<br>GTGTAGGCTGGAGCTGCTTCG | Lambda Red                                                               |
| RecA_stop_primingsite_2 | ATGCGACCCTTGTGTATCAAACAA<br>GACGATTAATAATCTTCGTTAGTTT<br>CCATATGAATATCCTCCTTA  | Lambda Red                                                               |
| CAT-584                 | AAGCCATCACAAACGGCATG                                                           | Lambda Red                                                               |
| BW25113_2815723f        | AATACGCGCAGGTCCATAAC                                                           | Lambda Red                                                               |
| LN192_recA1             | GTTCCATGGATGTGGAAACC                                                           | Lambda Red                                                               |
| LN193_recA2             | ATATCGACGCCAGTTTACG                                                            | Lambda Red                                                               |

330

331

## 332 **Standard molecular biology methods**

333 LA Taq polymerase (TaKaRa Bio Inc., Kusatsu, Japan) was used for conventional PCR to  
 334 detect transposon termini and their recombination products and for TA cloning of PCR  
 335 products. To generate quantity standards for quantitative PCR, *att<sub>Tn6945</sub>* and other fragments  
 336 (*gyrB*, *intA*) were PCR amplified from the genomic DNA of strain 04Ya249 and then cloned



337 into the pGEM-T vector using the pGEM-T easy vector system (Promega, Madison, WI, USA)  
338 and transformed into DH5 $\alpha$  competent cells. Quantitative PCR was performed using  
339 THUNDERBIRD<sup>®</sup> SYBR qPCR Mix (Toyobo, Osaka, Japan) and a CFX connect Real-Time system  
340 (BioRad, Hercules, CA, USA) and a two-step PCR protocol consisting of denaturation for 5 s  
341 at 95°C and annealing/extension for 30 s at 60°C. Target quantity was estimated based on a  
342 standard curve of the control plasmid DNA (pGEM-*gyrB*, pGEM-*intA*, pGEM-*att*<sub>Tn6945</sub>).  
343 Primers used for conventional PCR and quantitative PCR were designed based on the target;  
344 the oligonucleotides used and their specific purposes are shown in Table 1.

345

## 346 **Conjugation**

347 The donor *Vibrio* strain and *E. coli* recipient strains (JW0452, JW0452rif, and  
348 JW0452 $\Delta$ recArif) were grown overnight at 25°C and 37°C, respectively. A 500  $\mu$ l aliquot of  
349 each culture was mixed, centrifuged, and resuspended in 50  $\mu$ l of Luria-Bertani broth. The  
350 cell mixture was spotted on a 0.45  $\mu$ m pore-size nitrocellulose filter (Merck, Millipore Ltd.,  
351 Tullagreen, Ireland) placed on marine broth agar, and allowed to mate for 24 h at 25°C.  
352 After incubation, the cell mixture on the filter was serially diluted in 1 $\times$  phosphate-buffered  
353 saline, and then 100  $\mu$ l of the mixture was plated on appropriate agar medium to measure  
354 the CFU. *E. coli* transconjugants were selected after 24 h of incubation at 42°C in the  
355 presence of erythromycin, tetracycline, ampicillin, or both ampicillin and tetracycline,  
356 depending on the purpose of the assay. The *Vibrio* donor strain was selected on brain heart  
357 infusion agar with 2% NaCl supplemented with tetracycline at 25°C. The transconjugant  
358 strain TJ249 was obtained by mating strain 04Ya249 with *E. coli* strain JW0452 as the donor  
359 and recipient, respectively, followed by erythromycin selection at 42°C (Fig 1A).

360

## 361 **Southern hybridization**

362 The insertion copy number of Tn6945 in strain LN52 and 17 ampicillin-resistant  
363 transconjugants (JW0452 derivatives) was analyzed by Southern hybridization using the 5'-  
364 end of Tn6945 *intA* as a probe. The probe was generated using the PCR DIG Synthesis Kit  
365 (Roche, Basel, Switzerland), and inserts were detected by the standard method using CDT-  
366 star® (Roche). PCR products were obtained using primers LN112 and LN113 (Table 1).  
367 Genomic DNA (2.5 µg) was double digested with either *NdeI* and *SphI* or *NdeI* and *HindIII*  
368 (New England Biolabs, Ipswich, MA, USA) prior to electrophoresis.

369

## 370 **Antimicrobial susceptibility testing**

371 To examine the antimicrobial susceptibility of transconjugants harboring 1–3 beta-  
372 lactamase genes, the MIC of ampicillin was determined using the broth dilution method in  
373 96 well microtiter plate format according to standard M07 of the CLSI [51]. The antibiotic  
374 concentrations tested were 1000, 500, 250, 125, 62.5, 31.25, 16, 8, 4, and 2 µg/ml. The test  
375 plates were incubated at 35°C for 24 h.

376

## 377 **Genome sequencing**

378 Genomic DNA was extracted from 250–500 µl of *V. alfacensis* strains 04Ya249, 04Ya108, or  
379 *E. coli* strain TJ249 culture using the QIAGEN DNeasy blood & tissue kit (QIAGEN GmbH,  
380 Hilden, Germany). The extracted genomic DNA was sequenced on the Pacbio RS II platform  
381 at Macrogen (Tokyo, Japan). Genome assembly was conducted using HGAP v.3 [52] for  
382 *Vibrio* strains and Flye v 2.8.3-b1695 for *E. coli* TJ249 [53]. Reads were obtained at >120×

383 coverage for the chromosomes of each strain. Reads and the genome sequence of TJ249 has  
384 been posted to figshare [54]. Illumina reads of the pSEA2-free strain LN95 were also  
385 obtained using TruSeq PCR-free library and NovaSeq 6000 platform at NovogeneAIT  
386 Genomics Singapore Pte., Ltd. (Singapore) to confirm the loss of pSEA2 and to identify the  
387 circular form of Tn6945. The mapping results have been posted to figshare [25]. Genomes  
388 were compared using MUMmer3.23 [55] and GenomeMatcher [56]. AMR genes in the  
389 assembly were searched using AMRFinderPlus [57]. The average nucleotide identity was  
390 determined using fastANI [58].

391

## 392 **Accession numbers**

393 The complete genome sequences of strains 04Ya108 and 04Ya249 were submitted to  
394 DDBJ/NCBI/EMBL under accession numbers AP024165 (chr1 of 04Ya108), AP024166 (chr2 of  
395 04Ya108), AP024167 (pSEA1 of 04Ya108), AP024168 (pYa108 of 04Ya108), AP019849  
396 (chr1 of 04Ya249), AP019850 (chr2 of 04Ya249), AP019851 (pSEA2 of 04Ya249), and  
397 AP019852 (pVA249 of 04Ya249). The raw reads for strains 04Ya108, 04Ya249, and LN95 are  
398 available from Sequence Read Archive under accession numbers DRA011098, DRA008632,  
399 and DRA011762, respectively.

400

## 401 **Acknowledgments**

402 We thank the National Bioresource Project of the National Institute of Genetics, Japan for  
403 providing the *E. coli* strains BW25113, JW2669, and JW0452. We thank and Atsushi Ota and  
404 Fumito Maruyama at Hiroshima University for support of annotation on the TJ249 assembly.

405 We thank Yuichi Otsuka at Saitama University for helpful discussions and Yuta Sugimoto at  
406 Ehime University for experimental support.

407

## 408 **References**

- 409 1. Cabello FC, Godfrey HP, Tomova A, Ivanova L, Dölz H, Millanao A, et al. Antimicrobial  
410 use in aquaculture re-examined: its relevance to antimicrobial resistance and to animal  
411 and human health. *Environ Microbiol.* 2013;15: 1917–1942.
- 412 2. Cabello FC, Godfrey HP, Buschmann AH, Dölz HJ. Aquaculture as yet another  
413 environmental gateway to the development and globalisation of antimicrobial  
414 resistance. *Lancet Infect Dis.* 2016;16: e127–e133.
- 415 3. Magiorakos AP, Srinivasan A, Carey RB, Carmeli Y, Falagas ME, Giske CG, et al.  
416 Multidrug-resistant, extensively drug-resistant and pandrug-resistant bacteria: an  
417 international expert proposal for interim standard definitions for acquired resistance.  
418 *Clin Microbiol Infect.* 2012;18: 268–281.
- 419 4. Karakonstantis S, Kritsotakis EI, Gikas A. Pandrug-resistant Gram-negative bacteria: a  
420 systematic review of current epidemiology, prognosis and treatment options. *J*  
421 *Antimicrob Chemother.* 2020;75: 271–282.
- 422 5. Rodríguez-Beltrán J, DelaFuente J, León-Sampedro R, MacLean RC, San Millán Á.  
423 Beyond horizontal gene transfer: the role of plasmids in bacterial evolution. *Nat Rev*  
424 *Microbiol.* 2021
- 425 6. Johnson CM, Grossman AD. Integrative and Conjugative Elements (ICEs): What They  
426 Do and How They Work. *Annu Rev Genet.* 2015;49: 577–601.

- 427 7. Yano H, Rogers LM, Knox MG, Heuer H, Smalla K, Brown CJ, et al. Host range  
428 diversification within the IncP-1 plasmid group. *Microbiology (Reading)*. 2013;159:  
429 2303–2315.
- 430 8. Dahmane N, Libante V, Charron-Bourgoin F, Guédon E, Guédon G, Leblond-Bourget N,  
431 et al. Diversity of Integrative and Conjugative Elements of *Streptococcus salivarius* and  
432 Their Intra- and Interspecies Transfer. *Appl Environ Microbiol*. 2017;83:
- 433 9. Cabezón E, Lanka E, de la Cruz F. Requirements for mobilization of plasmids RSF1010  
434 and ColE1 by the IncW plasmid R388: *trwB* and RP4 *traG* are interchangeable. *J*  
435 *Bacteriol*. 1994;176: 4455–4458.
- 436 10. Carraro N, Matteau D, Luo P, Rodrigue S, Burrus V. The master activator of IncA/C  
437 conjugative plasmids stimulates genomic islands and multidrug resistance  
438 dissemination. *PLoS Genet*. 2014;10: e1004714.
- 439 11. Daccord A, Ceccarelli D, Burrus V. Integrating conjugative elements of the SXT/R391  
440 family trigger the excision and drive the mobilization of a new class of *Vibrio* genomic  
441 islands. *Mol Microbiol*. 2010;78: 576–588.
- 442 12. Garcillán-Barcia MP, Francia MV, de la Cruz F. The diversity of conjugative relaxases  
443 and its application in plasmid classification. *FEMS Microbiol Rev*. 2009;33: 657–687.
- 444 13. Villa L, Carattoli A. Plasmid Typing and Classification. *Methods Mol Biol*. 2020;2075:  
445 309–321.
- 446 14. Siguier P, Gourbeyre E, Chandler M. Bacterial insertion sequences: their genomic  
447 impact and diversity. *FEMS Microbiol Rev*. 2014;38: 865–891.
- 448 15. Nicolas E, Lambin M, Dandoy D, Galloy C, Nguyen N, Oger CA, et al. The Tn3-family of  
449 Replicative Transposons. *Microbiol Spectr*. 2015;3:

- 450 16. Nonaka L, Ikeno K, Suzuki S. Distribution of Tetracycline Resistance Gene, tet(M), in  
451 Gram-Positive and Gram-Negative Bacteria Isolated from Sediment and Seawater at a  
452 Coastal Aquaculture Site in Japan. *Microbes Environ.* 2007;22: 355–364.
- 453 17. Nonaka L, Maruyama F, Miyamoto M, Miyakoshi M, Kurokawa K, Masuda M. Novel  
454 conjugative transferable multiple drug resistance plasmid pAQU1 from  
455 *Photobacterium damsela* subsp. *damsela* isolated from marine aquaculture  
456 environment. *Microbes Environ.* 2012;27: 263–272.
- 457 18. Nonaka L, Maruyama F, Suzuki S, Masuda M. Novel macrolide-resistance genes, *mef(C)*  
458 and *mph(G)*, carried by plasmids from *Vibrio* and *Photobacterium* isolated from  
459 sediment and seawater of a coastal aquaculture site. *Lett Appl Microbiol.* 2015;61: 1–6.
- 460 19. Nonaka L, Yamamoto T, Maruyama F, Hirose Y, Onishi Y, Kobayashi T, et al. Interplay of  
461 a non-conjugative integrative element and a conjugative plasmid in the spread of  
462 antibiotic resistance via suicidal plasmid transfer from an aquaculture *Vibrio* isolate.  
463 *PLoS One.* 2018;13: e0198613.
- 464 20. Neela FA, Nonaka L, Suzuki S. The diversity of multi-drug resistance profiles in  
465 tetracycline-resistant *Vibrio* species isolated from coastal sediments and seawater. *J*  
466 *Microbiol.* 2007;45: 64–68.
- 467 21. Alcock BP, Raphenya AR, Lau TTY, Tsang KK, Bouchard M, Edalatmand A, et al. CARD  
468 2020: antibiotic resistome surveillance with the comprehensive antibiotic resistance  
469 database. *Nucleic Acids Res.* 2020;48: D517–D525.
- 470 22. Tansirichaiya S, Rahman MA, Roberts AP. The Transposon Registry. *Mob DNA.*  
471 2019;10: 40.

- 472 23. Kosek D, Hickman AB, Ghirlando R, He S, Dyda F. Structures of ISCth4 transpososomes  
473 reveal the role of asymmetry in copy-out/paste-in DNA transposition. *EMBO J.*  
474 2021;40: e105666.
- 475 24. Chandler M, Fayet O, Rousseau P, Ton Hoang B, Duval-Valentin G. Copy-out-Paste-in  
476 Transposition of IS911: A Major Transposition Pathway. *Microbiol Spectr.* 2015;3:
- 477 25. Yano H, Nonaka L. Illumina reads analysis of *Vibrio alfacensis* pSEA2-free strain LN95.  
478 URL: <https://doi.org/10.6084/m9.figshare.14338883>.
- 479 26. Chen J, McIlroy SE, Archana A, Baker DM, Panagiotou G. A pollution gradient  
480 contributes to the taxonomic, functional, and resistome diversity of microbial  
481 communities in marine sediments. *Microbiome.* 2019;7: 104.
- 482 27. Cornejo-Granados F, Lopez-Zavala AA, Gallardo-Becerra L, Mendoza-Vargas A, Sánchez  
483 F, Vichido R, et al. Microbiome of Pacific Whiteleg shrimp reveals differential bacterial  
484 community composition between Wild, Aquacultured and AHPND/EMS outbreak  
485 conditions. *Sci Rep.* 2017;7: 11783.
- 486 28. Llewellyn MS, McGinnity P, Dionne M, Letourneau J, Thonier F, Carvalho GR, et al. The  
487 biogeography of the atlantic salmon (*Salmo salar*) gut microbiome. *ISME J.* 2016;10:  
488 1280–1284.
- 489 29. Egerton S, Culloty S, Whooley J, Stanton C, Ross RP. The Gut Microbiota of Marine Fish.  
490 *Front Microbiol.* 2018;9: 873.
- 491 30. Thompson FL, Iida T, Swings J. Biodiversity of vibrios. *Microbiol Mol Biol Rev.* 2004;68:  
492 403–431.
- 493 31. Takemura AF, Chien DM, Polz MF. Associations and dynamics of *Vibrionaceae* in the  
494 environment, from the genus to the population level. *Front Microbiol.* 2014;5: 38.

- 495 32. Verma J, Bag S, Saha B, Kumar P, Ghosh TS, Dayal M, et al. Genomic plasticity  
496 associated with antimicrobial resistance in *Vibrio cholerae*. Proc Natl Acad Sci U S A.  
497 2019;116: 6226–6231.
- 498 33. Osei Sekyere J, Reta MA. Genomic and Resistance Epidemiology of Gram-Negative  
499 Bacteria in Africa: a Systematic Review and Phylogenomic Analyses from a One Health  
500 Perspective. mSystems. 2020;5: e00897–20.
- 501 34. Beaber JW, Burrus V, Hochhut B, Waldor MK. Comparison of SXT and R391, two  
502 conjugative integrating elements: definition of a genetic backbone for the mobilization  
503 of resistance determinants. Cell Mol Life Sci. 2002;59: 2065–2070.
- 504 35. Carraro N, Sauvé M, Matteau D, Lauzon G, Rodrigue S, Burrus V. Development of  
505 pVCR94ΔX from *Vibrio cholerae*, a prototype for studying multidrug resistant IncA/C  
506 conjugative plasmids. Front Microbiol. 2014;5: 44.
- 507 36. Folster JP, Katz L, McCullough A, Parsons MB, Knipe K, Sammons SA, et al. Multidrug-  
508 resistant IncA/C plasmid in *Vibrio cholerae* from Haiti. Emerg Infect Dis. 2014;20:  
509 1951–1953.
- 510 37. Liu M, Wong MH, Chen S. Molecular characterisation of a multidrug resistance  
511 conjugative plasmid from *Vibrio parahaemolyticus*. Int J Antimicrob Agents. 2013;42:  
512 575–579.
- 513 38. Carraro N, Rivard N, Ceccarelli D, Colwell RR, Burrus V. IncA/C Conjugative Plasmids  
514 Mobilize a New Family of Multidrug Resistance Islands in Clinical *Vibrio cholerae* Non-  
515 O1/Non-O139 Isolates from Haiti. mBio. 2016;7:
- 516 39. Nonaka L, Maruyama F, Onishi Y, Kobayashi T, Ogura Y, Hayashi T, et al. Various pAQU  
517 plasmids possibly contribute to disseminate tetracycline resistance gene *tet(M)* among  
518 marine bacterial community. Front Microbiol. 2014;5: 152.



- 519 40. Rowe-Magnus DA, Guerout AM, Mazel D. Bacterial resistance evolution by recruitment  
520 of super-integron gene cassettes. *Mol Microbiol.* 2002;43: 1657–1669.
- 521 41. Encinas D, Garcillán-Barcia MP, Santos-Merino M, Delaye L, Moya A, de la Cruz F.  
522 Plasmid conjugation from proteobacteria as evidence for the origin of xenologous  
523 genes in cyanobacteria. *J Bacteriol.* 2014;196: 1551–1559.
- 524 42. Kishida K, Inoue K, Ohtsubo Y, Nagata Y, Tsuda M. Host Range of the Conjugative  
525 Transfer System of IncP-9 Naphthalene-Catabolic Plasmid NAH7 and Characterization  
526 of Its oriT Region and Relaxase. *Appl Environ Microbiol.* 2017;83:
- 527 43. Heffron F, McCarthy BJ, Ohtsubo H, Ohtsubo E. DNA sequence analysis of the  
528 transposon Tn3: three genes and three sites involved in transposition of Tn3. *Cell.*  
529 1979;18: 1153–1163.
- 530 44. Wang R, van Dorp L, Shaw LP, Bradley P, Wang Q, Wang X, et al. The global distribution  
531 and spread of the mobilized colistin resistance gene *mcr-1*. *Nat Commun.* 2018;9: 1179.
- 532 45. Che Y, Yang Y, Xu X, Břinda K, Polz MF, Hanage WP, et al. Conjugative plasmids interact  
533 with insertion sequences to shape the horizontal transfer of antimicrobial resistance  
534 genes. *Proc Natl Acad Sci U S A.* 2021;118:
- 535 46. Elliott KT, Cuff LE, Neidle EL. Copy number change: evolving views on gene  
536 amplification. *Future Microbiol.* 2013;8: 887–899.
- 537 47. Jayaram M, Ma CH, Kachroo AH, Rowley PA, Guga P, Fan HF, et al. An Overview of  
538 Tyrosine Site-specific Recombination: From an Flp Perspective. *Microbiol Spectr.*  
539 2015;3:
- 540 48. Gomez-Gil B, Roque A, Chimetto L, Moreira APB, Lang E, Thompson FL. *Vibrio*  
541 *alfacsensis* sp. nov., isolated from marine organisms. *Int J Syst Evol Microbiol.* 2012;62:  
542 2955–2961.

- 543 49. Baba T, Ara T, Hasegawa M, Takai Y, Okumura Y, Baba M, et al. Construction of  
544 *Escherichia coli* K-12 in-frame, single-gene knockout mutants: the Keio collection. Mol  
545 Syst Biol. 2006;2: 2006.0008.
- 546 50. Datsenko KA, Wanner BL. One-step inactivation of chromosomal genes in *Escherichia*  
547 *coli* K-12 using PCR products. Proc Natl Acad Sci U S A. 2000;97: 6640–6645.
- 548 51. Wayne PA. Methods for Dilution Antimicrobial Susceptibility Tests for Bacteria That  
549 Grow Aerobically. 11th ed. CLSI standard M07. Clinical and Laboratory Standards  
550 Institute; 2018.
- 551 52. Chin CS, Alexander DH, Marks P, Klammer AA, Drake J, Heiner C, et al. Nonhybrid,  
552 finished microbial genome assemblies from long-read SMRT sequencing data. Nat  
553 Methods. 2013;10: 563–569.
- 554 53. Kolmogorov M, Yuan J, Lin Y, Pevzner PA. Assembly of long, error-prone reads using  
555 repeat graphs. Nat Biotechnol. 2019;37: 540–546.
- 556 54. Yano H, Nonaka L. Complete genome of transconjugant TJ249. URL:  
557 <https://doi.org/10.6084/m9.figshare.13332467>.
- 558 55. Kurtz S, Phillippy A, Delcher AL, Smoot M, Shumway M, Antonescu C, et al. Versatile  
559 and open software for comparing large genomes. Genome Biol. 2004;5: R12.
- 560 56. Ohtsubo Y, Ikeda-Ohtsubo W, Nagata Y, Tsuda M. GenomeMatcher: a graphical user  
561 interface for DNA sequence comparison. BMC Bioinformatics. 2008;9: 376.
- 562 57. Feldgarden M, Brover V, Haft DH, Prasad AB, Slotta DJ, Tolstoy I, et al. Validating the  
563 AMRFinder Tool and Resistance Gene Database by Using Antimicrobial Resistance  
564 Genotype-Phenotype Correlations in a Collection of Isolates. Antimicrob Agents  
565 Chemother. 2019;63: e00483–19.

566 58. Jain C, Rodriguez-R LM, Phillippy AM, Konstantinidis KT, Aluru S. High throughput ANI  
567 analysis of 90K prokaryotic genomes reveals clear species boundaries. *Nat Commun.*  
568 2018;9: 5114.

569

## 570 **Supporting information**

571 **S1 Fig. Analysis of Tn6945 insertion number by Southern hybridization.** (A) pSEA2-free  
572 *Vibrio* strain LN95 and parental strain 04Ya249. (B) Nineteen *E. coli* transconjugants and  
573 controls. Upper panel: digestion with *NdeI* and *SphI*. Lower panel: digestion with *NdeI* and  
574 *HindIII*. The color of the strain name indicates the Tn6945 copy number: blue, three copies;  
575 light blue, one copy; red, two copies.

576

577 **S2 Fig. Genetic map of pSEA2.** Locations of antimicrobial resistance (AMR) genes and  
578 Tn6945 in pSEA2. AMR genes were inferred using AMRFinderPlus [57]. Genes are visualized  
579 using CLC Sequence Viewer (Qiagen, Hilden Germany). Green arch denotes the region  
580 detected as a circular contig (contig1) in Pacbio RSII reads assembly of transconjugant strain  
581 TJ249. (B) Location of Tn6945 and Tn6283 insertion positions in pSEA1.

582

583 **S3 Fig. Comparison of the genome structure between strain 04Ya249 with 04Ya108, CAIM**  
584 **1831 or TJ249.** Structure comparison was performed using nucmer in MUMmer3 [55].

585 Purple dots indicate a match on the Watson strand, and light blue indicates a match on the  
586 Crick strand. (B) Average nucleotide identity (ANI) between two strains as determined by  
587 fastANI [58]. The commands used were as follows: (A) \$nucmer -minmatch

588 60 ../../data/04Ya249\_submission.fas ../../data/reference.fas

```
589 $mummerplot -x "[0,6000000]" -y "[0,22000000]" -postscript -p test out.delta; (B) $fastANI -  
590 q ../../data/04Ya249_submission.fas -r ../../data/CAIM1831_Refseq.fas -o  
591 04Ya249vsCAIM1831.txt  
592 $fastANI -q ../../data/04Ya249_submission.fas -r ../../data/04Ya108_submission.fas -o  
593 04Ya249vs04Ya108.txt  
594 $fastANI -q ../../data/04Ya249_submission.fas -r ../../data/04Ya108_submission.fas -o  
595 04Ya249vs04Ya108.txt
```

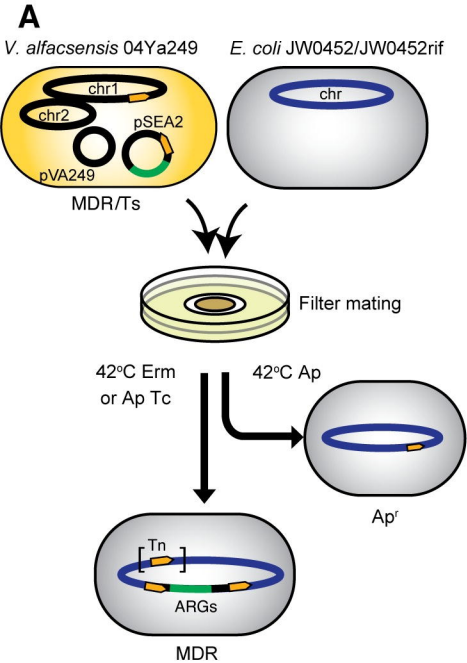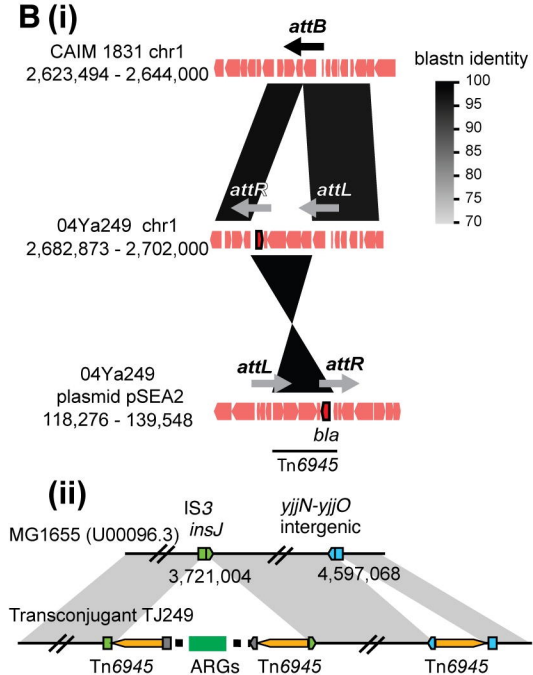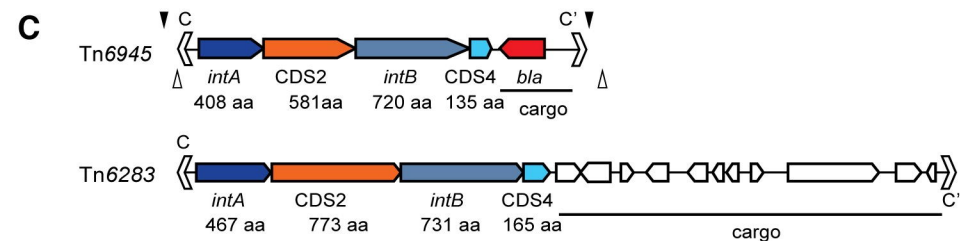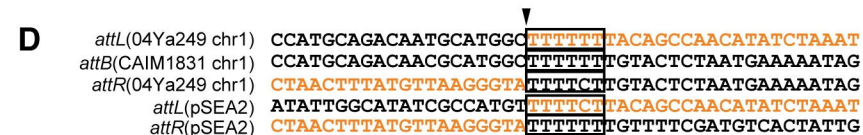

Cloned PCR products from *V. alfacensis* 04Ya249

|              |       |                 |        |                      |      |
|--------------|-------|-----------------|--------|----------------------|------|
| attTn type 1 | CTAAC | TTTATGTTAAGGGTA | TTTTTT | TACAGCCAACATATCTAAAT | 1/10 |
| attTn type 2 | CTAAC | TTTATGTTAAGGGTA | TTTTTC | TACAGCCAACATATCTAAAT | 9/10 |

Cloned PCR products from *V. alfacensis* LN95

|                |                     |         |                 |        |                       |       |
|----------------|---------------------|---------|-----------------|--------|-----------------------|-------|
|                |                     | C'      |                 | C      |                       |       |
|                | attTn type 1        | CTAAC   | TTTATGTTAAGGGTA | TTTTTT | TACAGCCAACATATCTAAAT  | 10/10 |
| <i>E. coli</i> | attL( <i>insJ</i> ) | ATCAACT | GATATTGCAATGT   | TTTTTC | TACAGCCAACATATCTAAAT  |       |
|                | attB( <i>insJ</i> ) | ATCAACT | GATATTGCAATGT   | TTTTTT | TGGTGCCAACTTTGAGCGCG  |       |
|                | attL( <i>insJ</i> ) | CTAAC   | TTTATGTTAAGGGTA | TTTTTC | TGGTGCCAACTTTGAGCGCG  |       |
|                | attL( <i>yjiN</i> ) | GGGGAAG | TGTTGGCGCTGT    | TTTTTT | TACAGCCAACATATCTAAAT  |       |
|                | attB( <i>yjiN</i> ) | GGGGAAG | TGTTGGCGCTGT    | TTTTTT | TGTTTTCTTAATAATGTGTTG |       |
|                | attR( <i>yjiN</i> ) | CTAAC   | TTTATGTTAAGGGTA | TTTTTC | TGTTTTCTTAATAATGTGTTG |       |



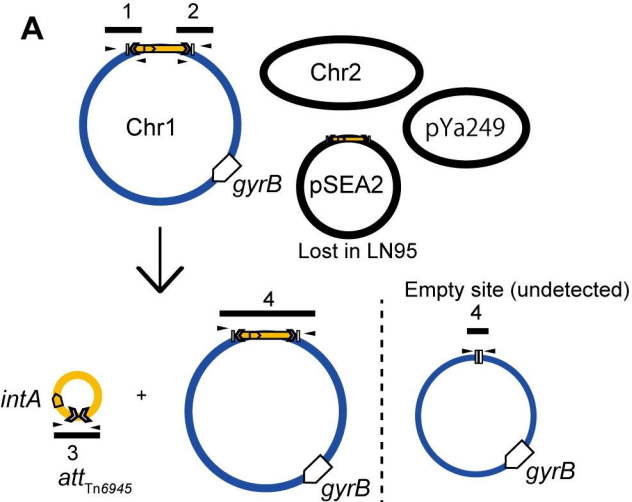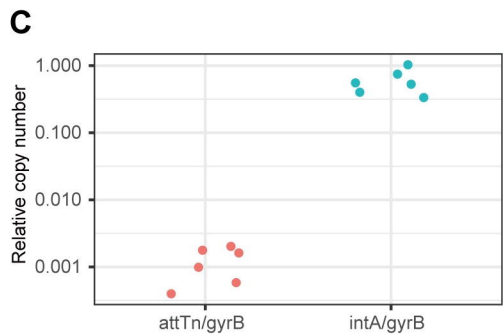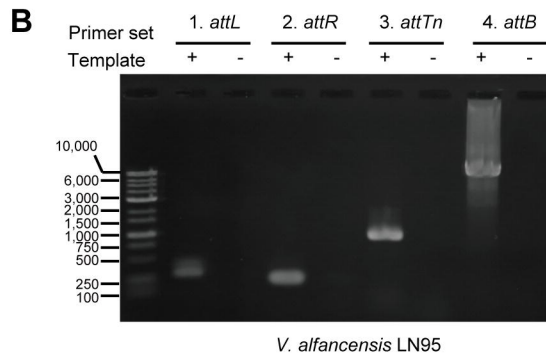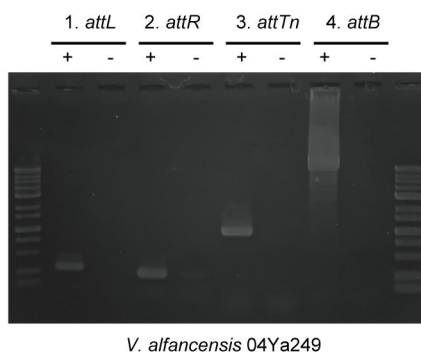

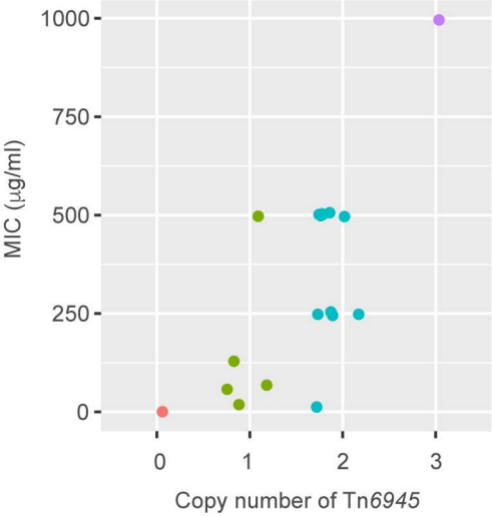

Source: http://biorxiv.org/content/10.1101/2021.06.22.449512v1.full.pdf
